# Supplementary material
Source: Elsevier journal article supplement (https://website.storage/Data/Staphorst/RTE/Bestanden/NieuwsItem/226/Jeugd/MMC1.pdf)
Supplement: MMC1 [file MMC1.pdf]

# Selectie MC1 2015-2016

|    | <b>Voornaam</b> | <b>Achternaam</b> | <b>Geboortedatum</b> | <b>KNVB nummer</b> | <b>Vorige Team</b> | <b>Opmerking</b> |
|----|-----------------|-------------------|----------------------|--------------------|--------------------|------------------|
| 1  | Angela          | Vos               | 2-3-2001             |                    | Nieuw lid          |                  |
| 2  | Amber           | de Weert          | 26-5-2001            | MJBC39V            | D4                 |                  |
| 3  | Nienke          | Schra             | 27-6-2001            | PYMY80U            | D4                 |                  |
| 4  | Elvira          | Ubak              | 6-7-2001             | PZTN81Q            | D4                 |                  |
| 5  | Amber           | Spiker            | 28-8-2001            |                    | Nieuw lid          |                  |
| 6  | Amber           | Witte             | 19-10-2001           | PKBZ63T            | D4                 |                  |
| 7  | Jamilla         | Kin               | 19-8-2002            | PKGT17N            | MD1                |                  |
| 8  | Ilse            | Hoogendijk        | 14-9-2002            | PSDT27P            | MD1                |                  |
| 9  | Yoni            | Troost            | 23-9-2002            | MGWD349            | MD1                |                  |
| 10 | Tessa           | Bloemert          | 29-10-2002           | PKTL86Q            | MD1                |                  |
| 11 | Gestelle        | Mussche           | 3-12-2002            | PMJB58N            | D3                 |                  |
| 12 | Sanne           | de Weerd          | 15-12-2002           | PKBZ602            | MD1                |                  |
| 13 | Myrthe          | Troost            | 17-12-2002           | PWFS247            | MD1                |                  |
| 14 | Elise           | Winters           | 16-2-2003            | PLRL79N            | MD1                |                  |
| 15 | Michelle        | Meulenbelt        | 23-4-2003            | PKBZ62S            | MD1                |                  |
| 16 | Anne            | Kisteman          | 5-6-2003             | NTHX29Q            | MD1                |                  |

Trainer  
Assistent  
Leider  
Administratie site  
Vlagger  
Trainingen  
Tijden  
Wedstrijden tijd

Dagmar de Boer    Brenda Grooters
